# Supplementary material
Source: Elsevier journal article supplement (https://www.sciencedirect.com/science/article/pii/S2530064419300598)
Supplement: mmc1 [file S2530064419300598:mmc1.docx]

SUPPLEMENTARY MATERIAL I. Identification of flights plotted on Figure 2.

| **Flight ID** | **From** | **Destination** | **Departure Date** | **Time** |
| --- | --- | --- | --- | --- |
| GLO1411 | Brasília (SBBR) | Guarulhos (SBGR) | 12/06/2019 | 09:25AM |
| GLO1744 | Brasília (SBBR) | Recife (SBRF) | 12/06/2019 | 09:52AM |
| GLO1718 | Brasília (SBBR) | Teresina (SBTE) | 12/06/2019 | 09:53AM |
| GLO1924 | Brasília (SBBR) | Salvador (SBSV) | 11/06/2019 | 10:09AM |
| GLO1726 | Brasília (SBBR) | Manaus (SBEG) | 12/06/2019 | 10:13AM |
| TAM3445 | Brasília (SBBR) | Galeão (SBGL) | 12/06/2019 | 06:43PM |
| TAM3885 | Brasília (SBBR) | Viracopos (SBKP) | 12/06/2019 | 06:50PM |
| GLO1447 | Brasília (SBBR) | Congonhas (SBSP) | 12/06/2019 | 09:20AM |
| GLO1700 | Brasília (SBBR) | Confins (SBCF) | 12/06/2019 | 09:25AM |
| GLO1756 | Brasília (SBBR) | Curitiba (SBCT) | 12/06/2019 | 09:45AM |
| AZU2855 | Brasília (SBBR) | Cuiabá (SBCY) | 12/06/2019 | 10:36AM |
| TAM3775 | Campo Grande (SBCG) | Congonhas (SBSP) | 12/06/2019 | 04:00AM |
| AZU2934 | Campo Grande (SBCG) | Curitiba (SBCT) | 12/06/2019 | 06:05AM |
| TAM9053 | Campo Grande (SBCG) | Brasília (SBBR) | 12/06/2019 | 09:44AM |
| GLO1921 | Confins (SBCF) | Guarulhos (SBGR) | 12/06/2019 | 06:04PM |
| AZU5355 | Confins (SBCF) | Uberlândia (SBUL) | 12/06/2019 | 06:10PM |
| AZU2616 | Confins (SBCF) | Ipatinga (SBIP) | 12/06/2019 | 06:17PM |
| TAM3755 | Confins (SBCF) | Santos Dumont (SBRJ) | 11/06/2019 | 06:44PM |
| AZU5047 | Confins (SBCF) | Vitória (SBVT) | 12/06/2019 | 06:45PM |
| GLO2183 | Confins (SBCF) | Galeão (SBGL) | 12/06/2019 | 07:09PM |
| GLO1315 | Confins (SBCF) | Congonhas (SBSP) | 12/06/2019 | 07:23PM |
| AZU2432 | Confins (SBCF) | Recife (SBRF) | 12/06/2019 | 07:38PM |
| TAM3252 | Congonhas (SBSP) | Galeão (SBGL) | 11/06/2019 | 07:41AM |
| TAM3023 | Congonhas (SBSP) | Foz do Iguaçu (SBFI) | 12/06/2019 | 08:00AM |
| TAM3460 | Congonhas (SBSP) | Goiânia (SBGO) | 12/06/2019 | 08:07AM |
| TAM3255 | Congonhas (SBSP) | Joinville (SBJV) | 12/06/2019 | 08:17AM |
| GLO1378 | Congonhas (SBSP) | Uberlândia (SBUL) | 12/06/2019 | 08:20AM |
| GLO1010 | Congonhas (SBSP) | Santos Dumont (SBRJ) | 12/06/2019 | 08:35AM |
| GLO1556 | Congonhas (SBSP) | Recife (SBRF) | 13/06/2019 | 02:50PM |
| TAM3247 | Cuiabá (SBCY) | Congonhas (SBSP) | 13/06/2019 | 04:09AM |
| AZU6491 | Curitiba (SBCT) | Confins (SBCF) | 12/06/2019 | 05:50AM |
| AZU2934B | Curitiba (SBCT) | Porto Alegre (SBPA) | 12/06/2019 | 09:01AM |
| AZU2478 | Curitiba (SBCT) | Londrina (SBLO) | 12/06/2019 | 09:11AM |
| GLO2125 | Curitiba (SBCT) | Galeão (SBGL) | 12/06/2019 | 09:21AM |
| AZU5156 | Curitiba (SBCT) | Maringá (SBMG) | 12/06/2019 | 09:40AM |
| AZU2873 | Curitiba (SBCT) | Congonhas (SBSP) | 12/06/2019 | 10:33AM |
| AZU6956 | Curitiba (SBCT) | Guarulhos (SBGR) | 12/06/2019 | 10:59AM |
| AZU4236 | Curitiba (SBCT) | Santos Dumont (SBRJ) | 12/06/2019 | 11:38AM |
| AZU5201 | Curitiba (SBCT) | Viracopos (SBKP) | 12/06/2019 | 02:29PM |
| AZU5756 | Curitiba (SBCT) | Foz do Iguaçu (SBFI) | 12/06/2019 | 02:35PM |
| TAM3150 | Curitiba (SBCT) | Brasília (SBBR) | 12/06/2019 | 09:16PM |
| GLO1253 | Florianópolis (SBFL) | Congonhas (SBSP) | 12/06/2019 | 07:42AM |
| AZU5122 | Fortaleza (SBFZ) | Confins (SBCF) | 12/06/2019 | 03:30AM |
| GLO1843 | Fortaleza (SBFZ) | Manaus (SBEG) | 11/06/2019 | 08:31AM |
| GLO1811 | Fortaleza (SBFZ) | Recife (SBRF) | 12/06/2019 | 08:46AM |
| AZU6960 | Fortaleza (SBFZ) | Teresina (SBTE) | 12/06/2019 | 08:54AM |
| TAM4569 | Fortaleza (SBFZ) | Natal (SBSG) | 12/06/2019 | 11:37AM |
| GLO1831 | Fortaleza (SBFZ) | Salvador (SBSV) | 12/06/2019 | 11:40AM |
| GLO1669 | Fortaleza (SBFZ) | Congonhas (SBSP) | 12/06/2019 | 12:00AM |
| TAM3328 | Fortaleza (SBFZ) | Guarulhos (SBGR) | 12/06/2019 | 12:28AM |
| AZU4471 | Fortaleza (SBFZ) | Viracopos (SBKP) | 12/06/2019 | 01:34PM |
| GLO1709 | Fortaleza (SBFZ) | Brasília (SBBR) | 12/06/2019 | 05:25PM |
| AZU5179 | Foz do Iguaçu (SBFI) | Porto Alegre (SBPA) | 12/06/2019 | 04:35PM |
| GLO1093 | Galeão (SBGL) | Guarulhos (SBGR) | 12/06/2019 | 07:41AM |
| GLO2012 | Galeão (SBGL) | Aracaju (SBAR) | 12/06/2019 | 08:26AM |
| GLO2096 | Galeão (SBGL) | Natal (SBSG) | 12/06/2019 | 08:29AM |
| GLO2167 | Galeão (SBGL) | João Pessoa (SBJP) | 13/06/2019 | 10:33AM |
| GLO2134 | Galeão (SBGL) | Florianópolis (SBFL) | 12/06/2019 | 12:36AM |
| GLO2178 | Galeão (SBGL) | Fortaleza (SBFZ) | 12/06/2019 | 12:38AM |
| GLO2000 | Galeão (SBGL) | Maceio (SBMO) | 12/06/2019 | 12:39AM |
| GLO2158 | Galeão (SBGL) | Vitória (SBVT) | 13/06/2019 | 12:54AM |
| TAM4568 | Galeão (SBGL) | Foz do Iguaçu (SBFI) | 12/06/2019 | 01:19PM |
| AZU4149 | Goiânia (GYN) | Viracopos (SBKP) | 12/06/2019 | 06:23PM |
| AZU2698 | Goiânia (SBGO) | Recife (SBRF) | 11/06/2019 | 04:28PM |
| LAN3142 | Guarulhos (SBGR) | Goiânia (SBGO) | 12/06/2019 | 07:21AM |
| GLO1242 | Guarulhos (SBGR) | Florianópolis (SBFL) | 12/06/2019 | 07:46AM |
| GLO1076 | Guarulhos (SBGR) | Santos Dumont (SBRJ) | 12/06/2019 | 07:56AM |
| TAM4614 | Guarulhos (SBGR) | São Luiz (SBSL) | 12/06/2019 | 08:04AM |
| TAM4684 | Guarulhos (SBGR) | Vitória (SBVT) | 12/06/2019 | 08:29AM |
| AZU4048 | Ilhéus (SBIL) | Salvador (SBSV) | 12/06/2019 | 02:00PM |
| AZU2515 | Jericoacoara (SBJE) | Confins (SBCF) | 13/06/2019 | 04:34PM |
| AZU5341 | Maceio (SBMO) | Recife (SBRF) | 12/06/2019 | 07:06PM |
| LAN3751 | Manaus (SBEG) | Guarulhos (SBGR) | 12/06/2019 | 02:26AM |
| AZU5067 | Manaus (SBEG) | Viracopos (SBKP) | 12/06/2019 | 04:08PM |
| AZU2595 | Maringá (SBMG) | Viracopos (SBKP) | 12/06/2019 | 07:46PM |
| LAN3167 | Natal (SBSG) | Guarulhos (SBGR) | 12/06/2019 | 02:08AM |
| GLO1922 | Porto Alegre (SBPA) | Brasília (SBBR) | 12/06/2019 | 06:12AM |
| AZU4429 | Porto Alegre (SBPA) | Florianópolis (SBFL) | 12/06/2019 | 02:53PM |
| AZU9154 | Porto Alegre (SBPA) | Chapecó (SBCH) | 11/06/2019 | 02:54PM |
| AZU5231 | Porto Alegre (SBPA) | Santos Dumont (SBRJ) | 12/06/2019 | 03:11PM |
| GLO2119 | Porto Alegre (SBPA) | Galeão (SBGL) | 11/06/2019 | 03:25PM |
| AZU4488 | Porto Alegre (SBPA) | Guarulhos (SBGR) | 12/06/2019 | 04:03PM |
| GLO1223 | Porto Alegre (SBPA) | Congonhas (SBSP) | 12/06/2019 | 04:12PM |
| AZU2565 | Porto Alegre (SBPA) | Confins (SBCF) | 12/06/2019 | 06:32PM |
| AZU9093 | Recife (SBRF) | Petrolina (SBPL) | 11/06/2019 | 04:37PM |
| AZU9142 | Recife (SBRF) | Campina Grande (SBKG) | 11/06/2019 | 05:35PM |
| AZU4128 | Recife (SBRF) | Galeão (SBGL) | 12/06/2019 | 05:41PM |
| AZU5203 | Recife (SBRF) | Viracopos (SBKP) | 12/06/2019 | 06:05PM |
| AZU2711 | Recife (SBRF) | Aracaju (AJU) | 12/06/2019 | 06:06:PM |
| AZU1621 | Recife (SBRF) | Guarulhos (SBGR) | 12/06/2019 | 06:20PM |
| AZU5070 | Recife (SBRF) | Natal (SBSG) | 12/06/2019 | 07:28PM |
| AZU4990 | Salvador (SBSV) | Recife (SBRF) | 12/06/2019 | 11:16AM |
| GLO2031 | Salvador (SBSV) | Galeão (SBGL) | 12/06/2019 | 01:50PM |
| GLO1831 | Salvador (SBSV) | Confins (SBCF) | 12/06/2019 | 02:19PM |
| GLO1571 | Salvador (SBSV) | Congonhas (SBSP) | 12/06/2019 | 02:54PM |
| AZU4423 | Salvador (SBSV) | Confins (SBCF) | 12/06/2019 | 03:24PM |
| AZU5045 | Salvador (SBSV) | Vitória (SBQV) | 12/06/2019 | 03:34PM |
| AZU4286 | Salvador (SBSV) | Viracopos (SBKP) | 12/06/2019 | 04:52PM |
| TAM4515 | Salvador (SBSV) | Guarulhos (SBGR) | 11/06/2019 | 06:07PM |
| AZU2447 | Santa Maria (SBSM) | Porto Alegre (SBPA) | 11/06/2019 | 03:21PM |
| TAM3022 | Santos Dumont (SBRJ) | Brasília (SBBR) | 10/06/2019 | 05:56AM |
| GLO2192 | Santos Dumont (SBRJ) | Vitória (SBVT) | 12/06/2019 | 09:26AM |
| AZU2642 | Santos Dumont (SBRJ) | Goiânia (SBGO) | 11/06/2019 | 09:46AM |
| AZU2625 | Santos Dumont (SBRJ) | Ribeirão Preto (SBRP) | 12/06/2019 | 09:53AM |
| AZU5290 | Santos Dumont (SBRJ) | Campos (SBCP) | 12/06/2019 | 11:18AM |
| AZU4298 | Santos Dumont (SBRJ) | Navegantes (SBNF) | 12/06/2019 | 01:52PM |
| AZU5336 | Santos Dumont (SBRJ) | São José dos Campos (SBSJ) | 12/06/2019 | 04:58PM |
| AZU4019 | Santos Dumont (SBRJ) | Viracopos (SBKP) | 12/06/2019 | 07:26PM |
| AZU2771 | São Luiz (SBSL) | Recife (SBRF) | 12/06/2019 | 03:26PM |
| GLO9810 | Viracopos (SBKP) | Congonhas (SBSP) | 12/06/2019 | 05:53AM |
| AZU9641 | Viracopos (SBKP) | Guarulhos (SBGR) | 11/06/2019 | 11:40AM |
| AZU2540 | Viracopos (SBKP) | Confins (SBCF) | 12/06/2019 | 04:02PM |
| AZU2444 | Viracopos (SBKP) | Porto Alegre (SBPA) | 12/06/2019 | 06:32PM |
| AZU4260 | Viracopos (SBKP) | Galeão (SBGL) | 12/06/2019 | 07:44PM |
| GLO1882 | Vitória (SBVT) | Salvador (SBSV) | 12/06/2019 | 12:30AM |
